# Supplementary material
Source: MDPI journal article supplement (https://www.mdpi.com/2077-1312/10/11/1666)
Supplement: s1 [file s1]

**Table S1.** Microbial community metabolism in A and C areas, as obtained from Biolog Ecoplates. Average Well Color Development (AWCD) peak values, number of metabolized substrates and days of incubation

| <b>Area A</b>  |                             |                                   |                        |                      |                             |                                   |                        |
|----------------|-----------------------------|-----------------------------------|------------------------|----------------------|-----------------------------|-----------------------------------|------------------------|
| <b>Station</b> | <b>Coastal zone</b>         |                                   |                        | <b>Offshore zone</b> |                             |                                   |                        |
|                | AWCD<br>peak (at<br>540 nm) | N of<br>metabolized<br>substrates | Days of<br>incubation) |                      | AWCD<br>peak (at<br>540 nm) | N of<br>metabolized<br>substrates | Days of<br>incubation) |
| 15-DCM         | 1.51                        | 31                                | 18                     | 20-DCM               | 1.75                        | 17                                | 3                      |
| 15-Deep        | 1.43                        | 28                                | 5                      | 20-Deep              | 4.13                        | 29                                | 1                      |
| 14-DCM         | 1.51                        | 29                                | 16                     |                      |                             |                                   |                        |
| 14-Deep        | 0.79                        | 26                                | 8                      |                      |                             |                                   |                        |
| 12-DCM         | 1,00                        | 23                                | 13                     | 18-DCM               | 1.84                        | 20                                | 5                      |
| 12-Deep        | 1.13                        | 25                                | 18                     | 18-Deep              | 1.37                        | 29                                | 6                      |
| 6-DCM          | 3.03                        | 27                                | 2                      |                      |                             |                                   |                        |
| 6-Deep1        | 1.56                        | 29                                | 6                      |                      |                             |                                   |                        |
| 6-Deep2        | 1.47                        | 31                                | 19                     |                      |                             |                                   |                        |
| 8-DCM          | 1.08                        | 28                                | 18                     |                      |                             |                                   |                        |
| 8-Deep         | 3.82                        | 28                                | 2                      |                      |                             |                                   |                        |
| 3-DCM          | 4.95                        | 29                                | 1                      |                      |                             |                                   |                        |
| 3-CDW          | 2.26                        | 23                                | 2                      |                      |                             |                                   |                        |
| 2-DCM          | 4.19                        | 29                                | 2                      |                      |                             |                                   |                        |
| 2-CDW          | 3.34                        | 29                                | 3                      |                      |                             |                                   |                        |
| <b>Area C</b>  |                             |                                   |                        |                      |                             |                                   |                        |
| <b>Station</b> | <b>Coastal zone</b>         |                                   |                        | <b>Offshore zone</b> |                             |                                   |                        |
|                |                             |                                   |                        | 63-DCM               | 2.31                        | 20                                | 4                      |
|                |                             |                                   |                        | 63-Deep              | 1.99                        | 23                                | 7                      |
|                |                             |                                   |                        | 64-DCM               | 3.11                        | 25                                | 3                      |
|                |                             |                                   |                        | 64-Deep              | 2.44                        | 25                                | 4                      |
|                |                             |                                   |                        | 65-200m              | 1.72                        | 19                                | 2                      |
|                |                             |                                   |                        | 66-100m              | 1.32                        | 17                                | 5                      |
|                |                             |                                   |                        | 67-220m              | 1.7                         | 22                                | 2                      |
|                |                             |                                   |                        | 68-20m               | 1.74                        | 26                                | 3                      |

68-240m

1.00

14

3

---
