# Supplementary material
Source: MDPI journal article supplement (https://www.mdpi.com/2077-1312/10/11/1666)
Supplement: s1 [file s1]

**Table S4.** Microbial community metabolism: Average Well Color Development value (AWCD), Richness and Shannon-Weaver diversity index per each area

| <b>Area A</b>  |                     |          |                |                      |       |          |                |
|----------------|---------------------|----------|----------------|----------------------|-------|----------|----------------|
| <b>Station</b> | <b>Coastal zone</b> |          |                | <b>Offshore zone</b> |       |          |                |
|                | AWCD                | Richness | Shannon-Weaver |                      | AWCD  | Richness | Shannon-Weaver |
| 15-DCM         | 0.049               | 2        | 0.648          | 20-DCM               | 0.056 | 8        | 2.055          |
| 15-Deep        | 0.046               | 2        | 0.600          | 20-Deep              | 0.134 | 19       | 2.898          |
| 14-DCM         | 0.049               | 2        | 0.527          | 19DCM                | 0.071 | 6        | 1.738          |
| 14-Deep        | 0.075               | 9        | 2.159          | 19Deep               | 0.089 | 13       | 2.502          |
| 12DCM          | 0.041               | 5        | 1.596          | 18DCM                | 0.059 | 6        | 1.725          |
| 12Deep         | 0.032               | 2        | 0.577          | 18Deep               | 0.228 | 2        | 0.085          |
| 6DCM           | 0.098               | 13       | 2.493          |                      |       |          |                |
| 6Deep          | 0.103               | 12       | 2.443          |                      |       |          |                |
| 8DCM           | 0.035               | 1        | 0.000          |                      |       |          |                |
| 8Deep          | 0.160               | 29       | 3.292          |                      |       |          |                |
| 3DCM           | 0.160               | 29       | 3.292          |                      |       |          |                |
| 3CDW           | 0.073               | 8        | 1.994          |                      |       |          |                |
| 2DCM           | 0.135               | 21       | 2.970          |                      |       |          |                |
| 2CDW           | 0.108               | 14       | 2.583          |                      |       |          |                |
| <b>Area C</b>  |                     |          |                |                      |       |          |                |
| <b>Station</b> | <b>Coastal zone</b> |          |                | <b>Offshore zone</b> |       |          |                |
|                |                     |          |                |                      |       |          |                |
|                |                     |          |                | 63DCM                | 0.075 | 10       | 2.258          |
|                |                     |          |                | 63-130               | 0.064 | 5        | 1.524          |
|                |                     |          |                | 64DCM                | 0.100 | 14       | 2.599          |
|                |                     |          |                | 64-100               | 0.079 | 9        | 2.149          |
|                |                     |          |                | 65-200               | 0.055 | 7        | 1.887          |
|                |                     |          |                | 66-100               | 0.043 | 5        | 1.576          |
|                |                     |          |                | 67-220               | 0.055 | 5        | 1.594          |
|                |                     |          |                | 68-20                | 0.121 | 19       | 2.897          |
|                |                     |          |                | 68-240               | 0.032 | 3        | 1.094          |
