# Supplementary material
Source: MDPI journal article supplement (https://www.mdpi.com/2077-1312/10/11/1666)
Supplement: s1 [file s1 › Figure S1.pdf]

A1

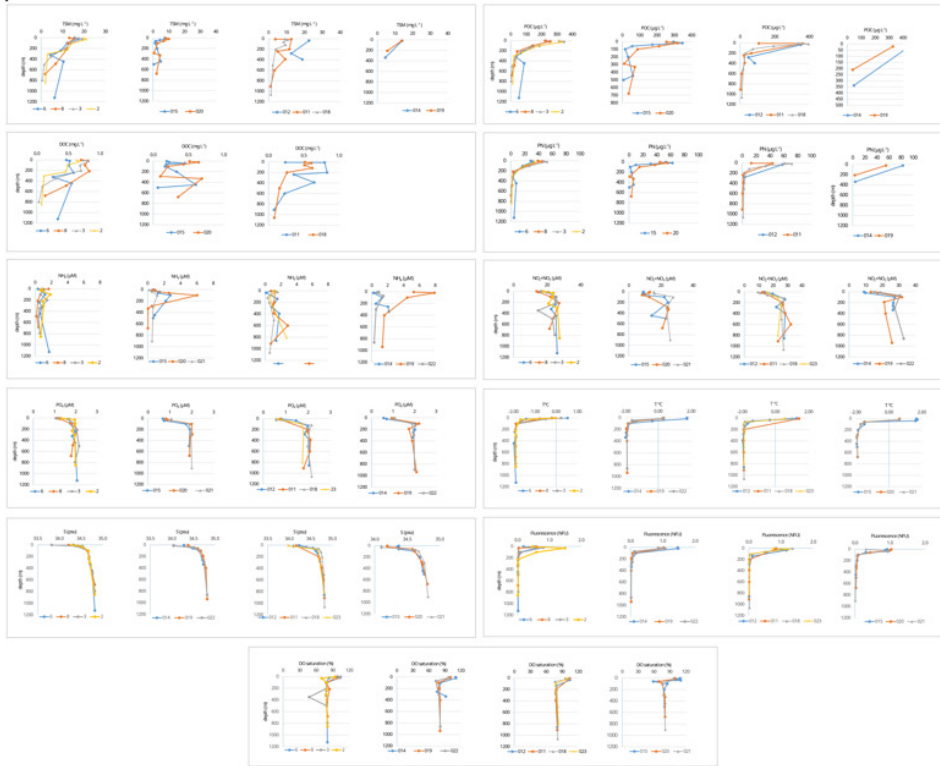

B1

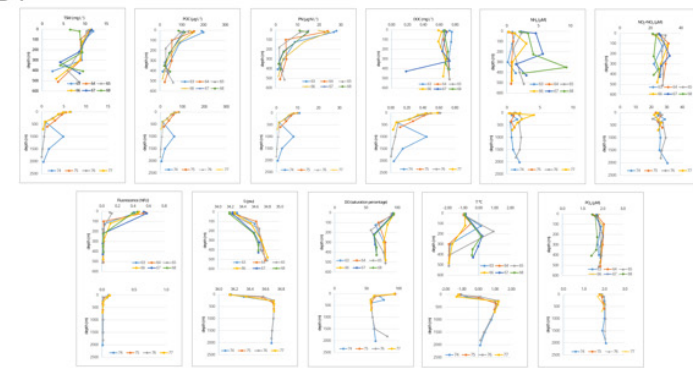

B2

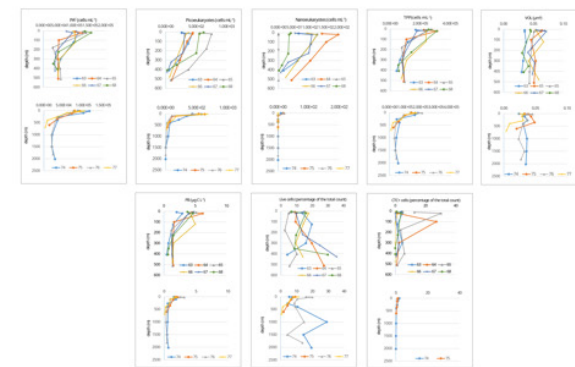

A2

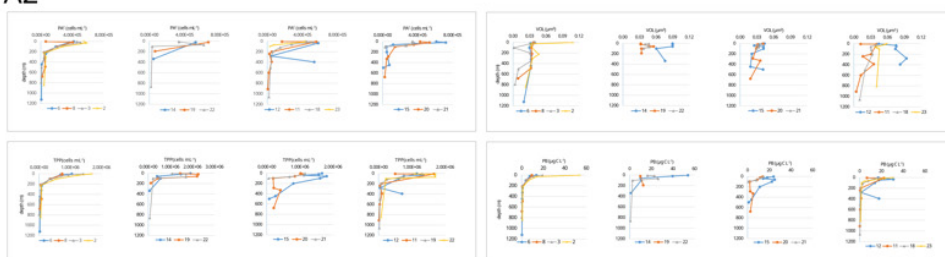

**Figure S1.** (A1) Vertical profiles of physical-chemical variables (Temperature, T; Salinity, S; Dissolved Oxygen, DO; Fluorescence; nutrients: ammonia,  $\text{NH}_4$ ; nitrite+nitrate,  $\text{NO}_2+\text{NO}_3$ ; phosphate,  $\text{PO}_4$ ; Total Suspended Matter, TSM; Particulate Organic Carbon, POC, Particulate Nitrogen, PN; Dissolved Organic Carbon, DOC) in the A area. (A2) Vertical profiles of microbial abundance (Prokaryotic abundance, TPP; Volume and Biomass; Prokaryotic abundance by cytometry,  $\text{PA}^{\text{C}}$ ) in the A area. (B1) Vertical profiles of physical-chemical variables (Temperature, T; Salinity, S; Dissolved Oxygen, DO; Fluorescence; nutrients: ammonia,  $\text{NH}_4$ ; nitrite+nitrate,  $\text{NO}_2+\text{NO}_3$ ; phosphate,  $\text{PO}_4$ ; Total Suspended matter, TSM; Particulate Organic Carbon, POC, Particulate Nitrogen, PN; Dissolved Organic Carbon, DOC) in the C area. (B2) Vertical profiles of microbial abundance (Prokaryotic abundance, TPP; Live cells; Actively respiring cells, CTC+; Volume and Biomass; Prokaryotic abundance by cytometry,  $\text{PA}^{\text{C}}$ ; Picoeukaryotes; Nanoeukaryotes) in the C area.
