# Supplementary material
Source: MDPI journal article supplement (https://www.mdpi.com/2077-1312/10/11/1666)
Supplement: s1 [file s1 › Figure S2.pdf]

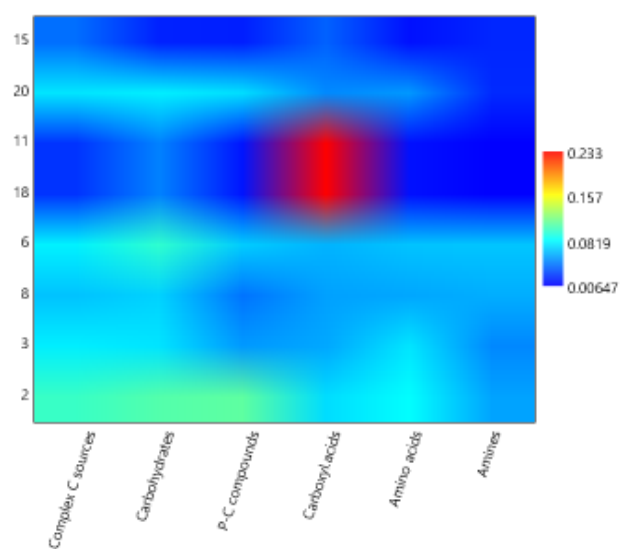

(a)

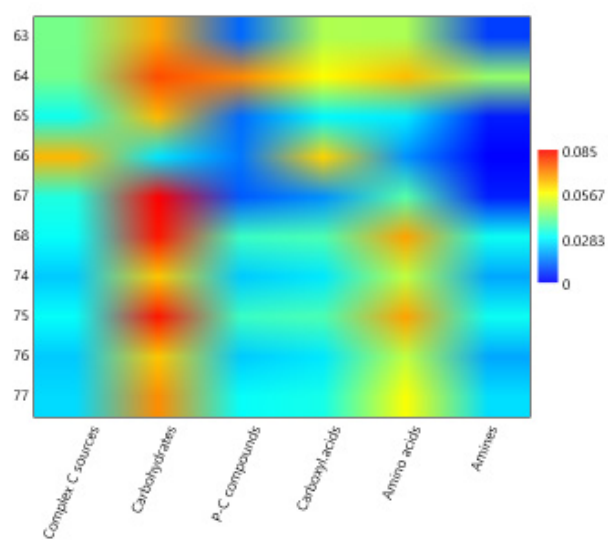

(b)

**Figure S2.** Heatmaps showing the capability of the microbial community to use the main classes of organic Carbon substrates in the A area **(a)** and in the C area **(b)**
