# Supplementary material
Source: MDPI journal article supplement (https://www.mdpi.com/2077-1312/10/11/1666)
Supplement: s1 [file s1 › Table S2.pdf]

**Table S2.** Results of ANOSIM and SIMPER analyses, performed per each study area and per physical-chemical, microbial abundances and metabolism separately.

ANOSIM results

| Variables      | Physical-Chemical |               |                |               | Microbial abundances |               |                |               |             | Microbial metabolism |                |               |      |  |
|----------------|-------------------|---------------|----------------|---------------|----------------------|---------------|----------------|---------------|-------------|----------------------|----------------|---------------|------|--|
|                | R Statistic       | Signif. level | Pairwise Tests | Signif. level | R Statistic          | Signif. level | Pairwise Tests | Signif. level | R Statistic | Signif. level        | Pairwise Tests | Signif. level |      |  |
| <b>A area</b>  |                   |               |                |               |                      |               |                |               |             |                      |                |               |      |  |
| among depths   | 0.711             | 0.1%          |                |               | 0.484                | 0.1%          |                |               | 0.508       | 0.1%                 |                |               |      |  |
|                |                   |               | Surface, CDW   | 0.831         | 0.1%                 |               | Surface, CDW   | 0.482         | 0.2%        |                      | Surface, Deep  | 0.647         | 0.1% |  |
|                |                   |               | Surface, Deep  | 0.921         | 0.1%                 |               | Surface, Deep  | 0.679         | 0.1%        |                      | DCM, Deep      | 0.750         | 0.1% |  |
|                |                   |               | DCM, CDW       | 0.782         | 0.1%                 |               | DCM, CDW       | 0.782         | 0.2%        |                      |                |               |      |  |
|                |                   |               | DCM, Deep      | 0.936         | 0.1%                 |               | DCM, Deep      | 0.737         | 0.1%        |                      |                |               |      |  |
| among stations | 0.015             | 61.0%         |                |               | 0.099                | 1.3%          |                |               | 0.048       | 85.1%                |                |               |      |  |
| <b>C area</b>  |                   |               |                |               |                      |               |                |               |             |                      |                |               |      |  |
| among depths   | 0.519             | 0.1%          |                |               | 0.370                | 0.1%          |                |               | 0.489       | 0.1%                 |                |               |      |  |
|                |                   |               | Surface, CDW   | 0.914         | 0.1%                 |               | Surface, Deep  | 0.432         | 0.1%        |                      | Surface, Deep  | 0.516         | 0.1% |  |
|                |                   |               | Surface, Deep  | 0.592         | 0.1%                 |               | DCM, Deep      | 0.639         | 0.1%        |                      | DCM, Deep      | 0.646         | 0.1% |  |
|                |                   |               | DCM, CDW       | 0.937         | 0.5%                 |               |                |               |             |                      | CDW, Deep      | 0.675         | 0.1% |  |
|                |                   |               | DCM, Deep      | 0.691         | 0.1%                 |               |                |               |             |                      |                |               |      |  |
| among stations | 0.217             | 0.1%          |                |               | 0.262                | 0.1%          |                |               | 0.006       | 42.9%                |                |               |      |  |

**SIMPER results**

| A area               |                   |                |                |          | C area               |                      |                |                |          |
|----------------------|-------------------|----------------|----------------|----------|----------------------|----------------------|----------------|----------------|----------|
|                      | Variable          | Av.Sq.Distance | Sq.Distance/SD | Contrib% |                      | Variable             | Av.Sq.Distance | Sq.Distance/SD | Contrib% |
| Physical-Chemical    |                   |                |                |          | Physical-Chemical    |                      |                |                |          |
| Surface vs CDW       | POC               | 5.02E+04       | 1.82           | 95.89    | Surface, CDW         | NO2+NO3              | 6.28           | 1.30           | 18.22    |
| Surface vs Deep      | POC               | 5.79E+04       | 1.95           | 96.06    |                      | DO                   | 4.21           | 3.34           | 12.23    |
| DCM vs CDW           | POC               | 5.79E+04       | 1.95           | 96.06    | Surface, Deep        | S                    | 4.87           | 3.84           | 9.85     |
| DCM vs Deep          | POC               | 9.12E+04       | 3.00           | 96.71    |                      | POC                  | 3.57           | 1.00           | 7.23     |
|                      |                   |                |                |          | DCM, CDW             | F                    | 5.80           | 1.84           | 15.48    |
|                      |                   |                |                |          |                      | PN                   | 4.84           | 1.32           | 12.91    |
|                      |                   |                |                |          | DCM, Deep            | PN                   | 6.12           | 1.54           | 9.95     |
|                      |                   |                |                |          |                      | F                    | 5.93           | 1.89           | 9.66     |
| Microbial abundances |                   |                |                |          | Microbial abundances |                      |                |                |          |
| Surface vs CDW       | Culturable bacte  | 8.03E+06       | 0.50           | 100.00   | Surface vs Deep      | TPP                  | 1.06           | 12.05          | 12.05    |
| Surface vs Deep      | Culturable bacte  | 1.47E+06       | 0.48           | 100.00   |                      | Picoeuk              | 0.81           | 11.69          | 23.74    |
| DCM vs CDW           | Culturable bacte  | 8.16E+06       | 0.51           | 100.00   |                      | LNA                  | 0.86           | 11.38          | 35.13    |
| DCM vs Deep          | Culturable bacte  | 1.73E+06       | 0.47           | 100.00   |                      |                      |                |                |          |
|                      |                   |                |                |          | DCM vs Deep          | Biomass              | 5.86           | 1.63           | 11.60    |
|                      |                   |                |                |          |                      | TPP                  | 5.26           | 1.26           | 10.41    |
|                      |                   |                |                |          |                      | HNA                  | 5.14           | 0.98           | 10.16    |
|                      |                   |                |                |          |                      | % CTC                | 5.00           | 0.46           | 9.90     |
| Microbial metabolism |                   |                |                |          | Microbial metabolism |                      |                |                |          |
| Surface vs Deep      | LAP               | 3.22           | 2.02           | 16.04    | Surface, Deep        | Aminoacids           | 3.51           | 1.08           | 16.51    |
|                      | complex C         | 3.06           | 0.80           | 15.23    |                      | Carbohydrates        | 3.36           | 1.11           | 15.80    |
| DCM vs Deep          | Proteolytic posit | 4.55           | 2.17           | 17.76    |                      | Amines               | 3.09           | 1.15           | 14.57    |
|                      | Phosphatase pos   | 4.16           | 1.60           | 16.24    |                      |                      |                |                |          |
|                      |                   |                |                |          | DCM, Deep            | P-C compounds        | 4.05           | 0.63           | 15.85    |
|                      |                   |                |                |          |                      | Carboxyl.acids       | 3.74           | 1.20           | 14.64    |
|                      |                   |                |                |          |                      | Phosphatase positive | 3.40           | 1.24           | 13.32    |
|                      |                   |                |                |          |                      | Proteolytic positive | 3.40           | 1.25           | 13.32    |
|                      |                   |                |                |          |                      |                      |                |                |          |
|                      |                   |                |                |          | CDW, Deep            | Complex C            | 4.63           | 1.40           | 23.45    |
|                      |                   |                |                |          |                      | Phosphatase positive | 4.15           | 1.30           | 21.03    |
