# Supplementary material
Source: MDPI journal article supplement (https://www.mdpi.com/2077-1312/10/11/1666)
Supplement: s1 [file s1 › Table S3.pdf]

**Table S3.** Spearman Rank Order Correlations on the A area dataset. Marked correlations are significant at a  $p < 0.05$

|                 | Physico-chemical and trophic variables |       |       |       |                 |                                    |       |       |       |       |       |       |                 | Microbial abundance data |       |       |       |       |       |       |        |        |       |        |       |        |        |          | Microbial metabolism |       |       |       |       |       |       |       |       |
|-----------------|----------------------------------------|-------|-------|-------|-----------------|------------------------------------|-------|-------|-------|-------|-------|-------|-----------------|--------------------------|-------|-------|-------|-------|-------|-------|--------|--------|-------|--------|-------|--------|--------|----------|----------------------|-------|-------|-------|-------|-------|-------|-------|-------|
|                 | T                                      | S     | DO    | FI    | NH <sub>4</sub> | NO <sub>2</sub> + IPO <sub>4</sub> | DOC   | SI    | SUVA  | TSM   | POC   | PN    | PA <sup>C</sup> | HNA                      | LNA   | Pico  | Nano  | Vol   | TPP   | PB    | % Live | % Deac | %CTC  | alphaP | betaP | gammaP | deltaP | epsilonP | FB                   | CCS   | CH    | PC    | CA    | AA    | AM    |       |       |
| T               | 1.00                                   | -0.85 | 0.63  | 0.79  | 0.00            | -0.67                              | -0.73 | 0.17  | 0.21  | 0.22  | 0.46  | 0.75  | 0.79            | 0.64                     | 0.64  | 0.68  | 0.53  | 0.53  | 0.29  | 0.83  | 0.79   | 0.14   | -0.14 | -0.37  | 0.63  | 0.45   | -0.32  | -0.64    | -0.42                | -0.26 | 0.07  | -0.16 | -0.01 | -0.39 | -0.22 | -0.12 |       |
| S               |                                        | 1.00  | -0.49 | -0.84 | 0.01            | 0.67                               | 0.75  | -0.19 | -0.25 | -0.09 | -0.40 | -0.77 | -0.79           | -0.62                    | -0.62 | -0.64 | -0.30 | -0.23 | -0.26 | -0.80 | -0.77  | -0.23  | 0.23  | 0.31   | -0.43 | -0.62  | 0.35   | 0.72     | 0.15                 | 0.20  | -0.06 | 0.08  | -0.09 | 0.40  | 0.10  | 0.15  |       |
| DO              |                                        |       | 1.00  | 0.54  | -0.11           | -0.70                              | -0.64 | 0.12  | 0.03  | 0.08  | 0.14  | 0.61  | 0.73            | 0.49                     | 0.47  | 0.58  | 0.57  | 0.66  | 0.34  | 0.61  | 0.63   | 0.06   | -0.06 | -0.09  | 0.49  | 0.58   | -0.61  | -0.77    | -0.08                | 0.13  | -0.18 | -0.01 | -0.01 | -0.13 | -0.12 | -0.19 |       |
| FI              |                                        |       |       | 1.00  | 0.02            | -0.67                              | -0.70 | 0.07  | 0.15  | 0.37  | 0.42  | 0.78  | 0.82            | 0.71                     | 0.71  | 0.71  | 0.27  | 0.32  | 0.24  | 0.82  | 0.80   | 0.02   | -0.02 | -0.11  | 0.38  | 0.45   | -0.12  | -0.41    | -0.41                | -0.16 | -0.07 | 0.01  | 0.14  | -0.21 | -0.10 | -0.35 |       |
| NH <sub>4</sub> |                                        |       |       |       | 1.00            | 0.19                               | 0.14  | 0.05  | -0.05 | 0.10  | -0.18 | -0.21 | -0.31           | -0.01                    | -0.03 | 0.00  | 0.00  | -0.07 | -0.04 | -0.07 | -0.05  | 0.02   | -0.02 | -0.08  | 0.06  | 0.00   | -0.10  | -0.15    | -0.09                | -0.05 | -0.37 | 0.14  | 0.02  | 0.30  | 0.15  | 0.04  |       |
| Nox             |                                        |       |       |       |                 | 1.00                               | 0.89  | 0.08  | -0.26 | -0.13 | -0.34 | -0.76 | -0.86           | -0.48                    | -0.45 | -0.58 | -0.48 | -0.40 | -0.26 | -0.62 | -0.61  | -0.10  | 0.10  | 0.08   | -0.71 | -0.62  | 0.35   | 0.70     | 0.24                 | 0.32  | 0.04  | 0.18  | -0.11 | 0.54  | 0.29  | 0.08  |       |
| PO <sub>4</sub> |                                        |       |       |       |                 |                                    | 1.00  | 0.02  | -0.14 | -0.14 | -0.30 | -0.72 | -0.80           | -0.49                    | -0.48 | -0.57 | -0.25 | -0.22 | -0.38 | -0.69 | -0.69  | -0.02  | 0.02  | 0.13   | -0.65 | -0.49  | 0.34   | 0.64     | 0.36                 | 0.22  | 0.17  | 0.18  | -0.10 | 0.49  | 0.29  | 0.17  |       |
| DOC             |                                        |       |       |       |                 |                                    |       | 1.00  | -0.21 | -0.26 | 0.43  | 0.10  | -0.01           | 0.08                     | 0.11  | 0.09  | 0.08  | 0.25  | 0.22  | 0.20  | 0.21   | 0.14   | -0.14 | -0.41  | 0.02  | 0.60   | -0.46  | -0.30    | -0.36                | 0.13  | -0.01 | 0.00  | -0.19 | -0.03 | 0.08  | -0.13 |       |
| SI              |                                        |       |       |       |                 |                                    |       |       | 1.00  | -0.20 | 0.00  | 0.12  | 0.27            | 0.08                     | 0.06  | 0.10  | 0.28  | 0.12  | -0.18 | 0.18  | 0.06   | 0.08   | -0.08 | 0.12   | 0.09  | 0.04   | 0.06   | 0.00     | 0.10                 | -0.33 | -0.13 | -0.08 | -0.15 | -0.39 | -0.11 | -0.08 |       |
| SUVA            |                                        |       |       |       |                 |                                    |       |       |       | 1.00  | 0.14  | 0.08  | 0.05            | 0.36                     | 0.36  | 0.33  | -0.24 | -0.30 | -0.03 | 0.37  | 0.41   | -0.29  | 0.29  | -0.15  | -0.31 | 0.06   | 0.46   | 0.10     | -0.51                | 0.13  | 0.06  | 0.12  | 0.02  | 0.05  | -0.08 | -0.18 |       |
| TSM             |                                        |       |       |       |                 |                                    |       |       |       |       | 1.00  | 0.53  | 0.33            | 0.40                     | 0.43  | 0.38  | -0.10 | 0.04  | 0.20  | 0.47  | 0.52   | 0.03   | -0.03 | -0.23  | 0.44  | 0.15   | -0.25  | -0.26    | -0.40                | -0.48 | 0.23  | 0.15  | 0.11  | -0.26 | 0.17  | 0.19  |       |
| POC             |                                        |       |       |       |                 |                                    |       |       |       |       |       | 1.00  | 0.90            | 0.79                     | 0.79  | 0.81  | 0.75  | 0.68  | 0.15  | 0.80  | 0.78   | 0.04   | -0.04 | -0.12  | 0.64  | 0.09   | -0.45  | -0.43    | -0.39                | -0.39 | 0.08  | 0.00  | 0.11  | -0.19 | -0.12 | -0.10 |       |
| PN              |                                        |       |       |       |                 |                                    |       |       |       |       |       |       | 1.00            | 0.69                     | 0.69  | 0.74  | 0.84  | 0.76  | 0.04  | 0.73  | 0.68   | 0.14   | -0.14 | 0.06   | 0.77  | 0.05   | -0.45  | -0.52    | -0.42                | -0.40 | -0.04 | -0.17 | -0.01 | -0.30 | -0.29 | -0.23 |       |
| PA <sup>C</sup> |                                        |       |       |       |                 |                                    |       |       |       |       |       |       |                 | 1.00                     | 0.99  | 0.96  | 0.58  | 0.64  | 0.21  | 0.87  | 0.86   | -0.25  | 0.25  | -0.15  | 0.30  | 0.48   | -0.32  | -0.41    | -0.55                | 0.03  | -0.04 | 0.00  | 0.08  | -0.25 | -0.17 | -0.29 |       |
| HNA             |                                        |       |       |       |                 |                                    |       |       |       |       |       |       |                 |                          | 1.00  | 0.93  | 0.56  | 0.61  | 0.22  | 0.87  | 0.87   | -0.27  | 0.27  | -0.05  | 0.28  | 0.46   | -0.28  | -0.37    | -0.54                | 0.02  | 0.00  | 0.02  | 0.09  | -0.23 | -0.13 | -0.26 |       |
| LNA             |                                        |       |       |       |                 |                                    |       |       |       |       |       |       |                 |                          |       | 1.00  | 0.66  | 0.70  | 0.21  | 0.84  | 0.83   | -0.12  | 0.12  | -0.28  | 0.32  | 0.54   | -0.33  | -0.42    | -0.58                | -0.01 | -0.05 | -0.10 | 0.00  | -0.29 | -0.30 | -0.23 |       |
| Pico            |                                        |       |       |       |                 |                                    |       |       |       |       |       |       |                 |                          |       |       | 1.00  | 0.94  | 0.22  | 0.34  | 0.41   | 0.10   | -0.10 | -0.32  | 0.27  | 0.47   | -0.43  | -0.28    | 0.07                 | 0.03  | -0.17 | -0.54 | -0.32 | -0.28 | -0.39 | 0.04  |       |
| Nano            |                                        |       |       |       |                 |                                    |       |       |       |       |       |       |                 |                          |       |       |       | 1.00  | 0.15  | 0.37  | 0.41   | 0.00   | 0.00  | -0.11  | 0.37  | -0.05  | -0.50  | -0.33    | -0.27                | 0.22  | -0.10 | -0.32 | -0.23 | -0.26 | -0.11 | 0.04  |       |
| Vol             |                                        |       |       |       |                 |                                    |       |       |       |       |       |       |                 |                          |       |       |       |       | 1.00  | 0.30  | 0.54   | 0.01   | -0.01 | -0.31  | 0.21  | 0.48   | -0.21  | -0.26    | -0.02                | -0.26 | -0.22 | -0.24 | -0.11 | -0.09 | -0.24 | -0.03 |       |
| TPP             |                                        |       |       |       |                 |                                    |       |       |       |       |       |       |                 |                          |       |       |       |       |       | 1.00  | 0.95   | -0.17  | 0.17  | -0.21  | 0.41  | 0.56   | -0.28  | -0.51    | -0.61                | -0.07 | -0.06 | 0.05  | 0.07  | -0.28 | -0.09 | -0.30 |       |
| PB              |                                        |       |       |       |                 |                                    |       |       |       |       |       |       |                 |                          |       |       |       |       |       |       | 1.00   | -0.17  | 0.17  | -0.28  | 0.38  | 0.54   | -0.25  | -0.48    | -0.56                | -0.07 | -0.16 | -0.07 | 0.02  | -0.29 | -0.20 | -0.40 |       |
| % Live          |                                        |       |       |       |                 |                                    |       |       |       |       |       |       |                 |                          |       |       |       |       |       |       |        | 1.00   | -1.00 | 0.02   | -0.14 | 0.12   | 0.24   | 0.00     | 0.20                 | -0.40 | 0.20  | -0.29 | -0.12 | 0.03  | -0.07 | 0.33  |       |
| % Dead          |                                        |       |       |       |                 |                                    |       |       |       |       |       |       |                 |                          |       |       |       |       |       |       |        |        | 1.00  |        | -0.02 | 0.14   | -0.12  | -0.24    | 0.00                 | -0.20 | 0.40  | -0.20 | 0.29  | 0.12  | -0.03 | 0.07  | -0.33 |
| %CTC            |                                        |       |       |       |                 |                                    |       |       |       |       |       |       |                 |                          |       |       |       |       |       |       |        |        |       | 1.00   | -0.26 | -0.53  | -0.04  | 0.33     | -0.13                | 0.65  | 0.10  | 0.26  | 0.19  | 0.40  | 0.37  | 0.34  |       |
| alphaP          |                                        |       |       |       |                 |                                    |       |       |       |       |       |       |                 |                          |       |       |       |       |       |       |        |        |       |        | 1.00  | 0.37   | -0.49  | -0.70    | 0.01                 | -0.46 | -0.15 | -0.30 | -0.09 | -0.41 | -0.38 | -0.02 |       |
| betaP           |                                        |       |       |       |                 |                                    |       |       |       |       |       |       |                 |                          |       |       |       |       |       |       |        |        |       |        |       | 1.00   | -0.31  | -0.59    | -0.34                | -0.22 | 0.07  | 0.20  | -0.02 | 0.00  | 0.00  | -0.02 |       |
| gammaP          |                                        |       |       |       |                 |                                    |       |       |       |       |       |       |                 |                          |       |       |       |       |       |       |        |        |       |        |       |        | 1.00   | 0.49     | -0.08                | -0.32 | -0.17 | 0.12  | 0.12  | -0.15 | 0.05  | -0.21 |       |
| deltaP          |                                        |       |       |       |                 |                                    |       |       |       |       |       |       |                 |                          |       |       |       |       |       |       |        |        |       |        |       |        |        | 1.00     | -0.04                | 0.20  | 0.07  | 0.06  | 0.26  | 0.28  | 0.12  | 0.03  |       |
| epsilonP        |                                        |       |       |       |                 |                                    |       |       |       |       |       |       |                 |                          |       |       |       |       |       |       |        |        |       |        |       |        |        |          | 1.00                 | -0.08 | 0.10  | -0.36 | -0.23 | 0.03  | -0.17 | 0.29  |       |
| FB              |                                        |       |       |       |                 |                                    |       |       |       |       |       |       |                 |                          |       |       |       |       |       |       |        |        |       |        |       |        |        |          |                      | 1.00  | -0.08 | 0.21  | -0.10 | 0.45  | 0.23  | 0.05  |       |
| CCS             |                                        |       |       |       |                 |                                    |       |       |       |       |       |       |                 |                          |       |       |       |       |       |       |        |        |       |        |       |        |        |          |                      |       | 1.00  | 0.50  | 0.65  | 0.22  | 0.62  | 0.69  |       |
| CH              |                                        |       |       |       |                 |                                    |       |       |       |       |       |       |                 |                          |       |       |       |       |       |       |        |        |       |        |       |        |        |          |                      |       |       | 1.00  | 0.66  | 0.48  | 0.85  | 0.55  |       |
| PC              |                                        |       |       |       |                 |                                    |       |       |       |       |       |       |                 |                          |       |       |       |       |       |       |        |        |       |        |       |        |        |          |                      |       |       |       | 1.00  | 0.39  | 0.72  | 0.56  |       |
| CA              |                                        |       |       |       |                 |                                    |       |       |       |       |       |       |                 |                          |       |       |       |       |       |       |        |        |       |        |       |        |        |          |                      |       |       |       |       | 1.00  | 0.41  | 0.32  |       |
| AA              |                                        |       |       |       |                 |                                    |       |       |       |       |       |       |                 |                          |       |       |       |       |       |       |        |        |       |        |       |        |        |          |                      |       |       |       |       |       | 1.00  | 0.61  |       |
| AM              |                                        |       |       |       |                 |                                    |       |       |       |       |       |       |                 |                          |       |       |       |       |       |       |        |        |       |        |       |        |        |          |                      |       |       |       |       |       |       | 1.00  |       |

alphaP = alphaproteobacteria; betaP = betaproteobacteria; gammaP = gammaproteobacteria; deltaP = deltaproteobacteria; epsilonP = epsilonproteobacteria; CCS = complex carbon source; CH = carbohydrates; PC = phosphate – carbon; CA = carboxylic acid; AA = aminoacids; AM = amines. For the other acronyms, see explanations in the “Material and methods” section.

**Table S3 (follows).** Spearman Rank Order Correlations on the C area dataset. Marked correlations are significant at a  $p < 0.05$

| Physico-chemical and trophic variables |      |             |              |              |                 |                                   |                 |       |              |              |              |              |              | Microbial abundance data |              |              |              |              |              |              |              |        |        |              | Microbial metabolism |              |              |              |              |             |
|----------------------------------------|------|-------------|--------------|--------------|-----------------|-----------------------------------|-----------------|-------|--------------|--------------|--------------|--------------|--------------|--------------------------|--------------|--------------|--------------|--------------|--------------|--------------|--------------|--------|--------|--------------|----------------------|--------------|--------------|--------------|--------------|-------------|
|                                        | T    | S           | DO           | Fl           | NH <sub>4</sub> | NO <sub>2</sub> + NO <sub>3</sub> | PO <sub>4</sub> | DOC   | SI           | SUVA         | TSM          | POC          | PN           | PA <sup>C</sup>          | HNA          | LNA          | Pico         | Nano         | Vol          | TPP          | PB           | % Live | % Dead | % CTC        | CCS                  | CH           | PC           | CA           | AA           | AM          |
| T                                      | 1.00 | <b>0.31</b> | <b>-0.71</b> | <b>-0.52</b> | 0.15            | 0.20                              | <b>0.43</b>     | -0.34 | -0.34        | 0.30         | -0.13        | -0.37        | -0.37        | <b>-0.57</b>             | <b>-0.53</b> | <b>-0.61</b> | <b>-0.46</b> | -0.06        | <b>-0.31</b> | <b>-0.45</b> | <b>-0.48</b> | -0.03  | 0.03   | -0.15        | 0.23                 | 0.28         | -0.14        | -0.11        | 0.10         | -0.13       |
| S                                      |      | 1.00        | <b>-0.72</b> | <b>-0.76</b> | -0.10           | <b>0.42</b>                       | <b>0.48</b>     | 0.32  | -0.26        | <b>-0.55</b> | <b>-0.58</b> | <b>-0.69</b> | <b>-0.68</b> | <b>-0.75</b>             | <b>-0.73</b> | <b>-0.73</b> | <b>-0.83</b> | 0.00         | -0.27        | <b>-0.78</b> | <b>-0.73</b> | 0.06   | -0.06  | -0.07        | <b>-0.33</b>         | <b>-0.50</b> | <b>-0.41</b> | <b>-0.46</b> | <b>-0.43</b> | -0.13       |
| DO                                     |      |             | 1.00         | <b>0.80</b>  | -0.12           | <b>-0.33</b>                      | <b>-0.53</b>    | -0.12 | <b>0.53</b>  | 0.27         | <b>0.61</b>  | <b>0.84</b>  | <b>0.85</b>  | <b>0.78</b>              | <b>0.76</b>  | <b>0.81</b>  | <b>0.49</b>  | <b>0.66</b>  | <b>0.48</b>  | <b>0.74</b>  | <b>0.76</b>  | -0.04  | 0.04   | -0.06        | 0.16                 | 0.16         | <b>0.46</b>  | <b>0.49</b>  | 0.25         | 0.20        |
| Fl                                     |      |             |              | 1.00         | -0.07           | <b>-0.41</b>                      | <b>-0.58</b>    | -0.06 | <b>0.48</b>  | <b>0.37</b>  | <b>0.81</b>  | <b>0.83</b>  | <b>0.87</b>  | <b>0.86</b>              | <b>0.88</b>  | <b>0.83</b>  | 0.09         | <b>0.87</b>  | <b>0.40</b>  | <b>0.84</b>  | <b>0.82</b>  | 0.02   | -0.02  | -0.08        | 0.37                 | 0.33         | <b>0.47</b>  | <b>0.55</b>  | <b>0.40</b>  | 0.19        |
| NH <sub>4</sub>                        |      |             |              |              | 1.00            | 0.16                              | -0.18           | -0.25 | -0.15        | 0.15         | -0.26        | -0.19        | -0.19        | -0.03                    | -0.09        | -0.03        | -0.14        | -0.21        | -0.02        | 0.03         | -0.02        | -0.14  | 0.14   | -0.12        | -0.22                | 0.06         | -0.34        | <b>-0.37</b> | -0.14        | -0.32       |
| NO <sub>2</sub> + NO <sub>3</sub>      |      |             |              |              |                 | 1.00                              | <b>0.69</b>     | -0.15 | <b>-0.37</b> | -0.06        | <b>-0.47</b> | -0.35        | -0.34        | <b>-0.33</b>             | <b>-0.34</b> | <b>-0.28</b> | -0.13        | -0.22        | 0.11         | -0.26        | -0.22        | -0.01  | 0.01   | 0.15         | 0.27                 | 0.12         | 0.17         | 0.00         | 0.01         | 0.21        |
| PO <sub>4</sub>                        |      |             |              |              |                 |                                   | 1.00            | -0.19 | -0.36        | -0.24        | <b>-0.53</b> | <b>-0.51</b> | <b>-0.43</b> | <b>-0.56</b>             | <b>-0.57</b> | <b>-0.51</b> | -0.14        | <b>-0.51</b> | -0.27        | <b>-0.51</b> | <b>-0.48</b> | 0.10   | -0.10  | 0.11         | 0.29                 | 0.00         | 0.06         | -0.01        | -0.03        | 0.17        |
| DOC                                    |      |             |              |              |                 |                                   |                 | 1.00  | -0.04        | -0.22        | 0.09         | 0.13         | 0.10         | -0.01                    | 0.02         | 0.00         | -0.24        | 0.40         | <b>-0.53</b> | -0.27        | <b>-0.37</b> | 0.07   | -0.07  | -0.03        | -0.28                | -0.07        | -0.14        | -0.11        | 0.09         | 0.04        |
| SI                                     |      |             |              |              |                 |                                   |                 |       | 1.00         | 0.05         | 0.40         | <b>0.48</b>  | <b>0.48</b>  | <b>0.47</b>              | <b>0.49</b>  | <b>0.44</b>  | -0.54        | 0.34         | 0.17         | 0.30         | 0.31         | -0.19  | 0.19   | 0.00         | 0.17                 | -0.11        | 0.02         | 0.28         | -0.12        | -0.22       |
| SUVA                                   |      |             |              |              |                 |                                   |                 |       |              | 1.00         | 0.29         | 0.33         | 0.32         | <b>0.42</b>              | 0.36         | <b>0.42</b>  | <b>0.68</b>  | -0.51        | 0.33         | <b>0.45</b>  | <b>0.47</b>  | -0.28  | 0.28   | -0.28        | <b>0.40</b>          | <b>0.45</b>  | <b>0.39</b>  | <b>0.39</b>  | <b>0.37</b>  | 0.24        |
| TSM                                    |      |             |              |              |                 |                                   |                 |       |              |              | 1.00         | <b>0.71</b>  | <b>0.75</b>  | <b>0.47</b>              | <b>0.57</b>  | <b>0.49</b>  | -0.54        | 0.48         | 0.36         | <b>0.56</b>  | <b>0.57</b>  | -0.08  | 0.08   | 0.05         | -0.16                | -0.08        | 0.06         | 0.14         | -0.05        | -0.33       |
| POC                                    |      |             |              |              |                 |                                   |                 |       |              |              |              | 1.00         | <b>0.97</b>  | <b>0.81</b>              | <b>0.87</b>  | <b>0.75</b>  | -0.29        | 0.57         | 0.35         | <b>0.75</b>  | <b>0.71</b>  | -0.10  | 0.10   | 0.13         | 0.06                 | 0.08         | 0.33         | <b>0.52</b>  | 0.25         | -0.09       |
| PN                                     |      |             |              |              |                 |                                   |                 |       |              |              |              |              | 1.00         | <b>0.76</b>              | <b>0.83</b>  | <b>0.74</b>  | -0.58        | <b>0.68</b>  | 0.41         | <b>0.76</b>  | <b>0.75</b>  | -0.09  | 0.09   | 0.03         | 0.08                 | 0.09         | 0.33         | <b>0.51</b>  | 0.27         | -0.12       |
| PA <sup>C</sup>                        |      |             |              |              |                 |                                   |                 |       |              |              |              |              |              | 1.00                     | <b>0.98</b>  | <b>0.96</b>  | <b>0.67</b>  | 0.18         | <b>0.40</b>  | <b>0.91</b>  | <b>0.88</b>  | -0.14  | 0.14   | 0.14         | 0.34                 | 0.33         | <b>0.48</b>  | <b>0.64</b>  | <b>0.38</b>  | 0.16        |
| HNA                                    |      |             |              |              |                 |                                   |                 |       |              |              |              |              |              |                          | 1.00         | <b>0.92</b>  | 0.40         | <b>0.48</b>  | <b>0.39</b>  | <b>0.90</b>  | <b>0.86</b>  | -0.11  | 0.11   | 0.08         | <b>0.41</b>          | 0.35         | <b>0.54</b>  | <b>0.71</b>  | <b>0.42</b>  | 0.18        |
| LNA                                    |      |             |              |              |                 |                                   |                 |       |              |              |              |              |              |                          |              | 1.00         | <b>0.80</b>  | -0.13        | <b>0.44</b>  | <b>0.89</b>  | <b>0.88</b>  | -0.11  | 0.11   | 0.10         | 0.26                 | 0.36         | <b>0.47</b>  | <b>0.53</b>  | <b>0.38</b>  | 0.19        |
| Pico                                   |      |             |              |              |                 |                                   |                 |       |              |              |              |              |              |                          |              |              | 1.00         | -0.09        | 0.13         | 0.38         | 0.31         | -0.35  | 0.35   | 0.19         | 0.16                 | 0.30         | 0.38         | 0.18         | 0.17         | 0.49        |
| Nano                                   |      |             |              |              |                 |                                   |                 |       |              |              |              |              |              |                          |              |              |              | 1.00         | <b>0.55</b>  | <b>0.57</b>  | <b>0.57</b>  | 0.37   | -0.37  | <b>-0.58</b> | 0.11                 | -0.12        | 0.36         | 0.40         | 0.05         | -0.03       |
| Vol                                    |      |             |              |              |                 |                                   |                 |       |              |              |              |              |              |                          |              |              |              |              | 1.00         | <b>0.53</b>  | <b>0.68</b>  | 0.13   | -0.13  | -0.13        | 0.22                 | 0.12         | 0.36         | 0.20         | 0.04         | 0.18        |
| TPP                                    |      |             |              |              |                 |                                   |                 |       |              |              |              |              |              |                          |              |              |              |              |              | 1.00         | <b>0.97</b>  | -0.02  | 0.02   | 0.10         | <b>0.42</b>          | <b>0.44</b>  | <b>0.53</b>  | <b>0.61</b>  | <b>0.44</b>  | 0.14        |
| PB                                     |      |             |              |              |                 |                                   |                 |       |              |              |              |              |              |                          |              |              |              |              |              |              | 1.00         | -0.01  | 0.01   | 0.03         | 0.37                 | 0.30         | <b>0.50</b>  | <b>0.54</b>  | 0.32         | 0.11        |
| % Live                                 |      |             |              |              |                 |                                   |                 |       |              |              |              |              |              |                          |              |              |              |              |              |              |              | 1.00   | -1.00  | -0.05        | 0.08                 | -0.17        | -0.11        | -0.08        | -0.11        | -0.03       |
| % Dead                                 |      |             |              |              |                 |                                   |                 |       |              |              |              |              |              |                          |              |              |              |              |              |              |              |        | 1.00   | 0.05         | -0.08                | 0.17         | 0.11         | 0.08         | 0.11         | 0.03        |
| % CTC                                  |      |             |              |              |                 |                                   |                 |       |              |              |              |              |              |                          |              |              |              |              |              |              |              |        |        | 1.00         | -0.08                | -0.01        | -0.10        | -0.05        | -0.04        | -0.04       |
| CCS                                    |      |             |              |              |                 |                                   |                 |       |              |              |              |              |              |                          |              |              |              |              |              |              |              |        |        |              | 1.00                 | <b>0.61</b>  | <b>0.65</b>  | <b>0.80</b>  | <b>0.57</b>  | <b>0.43</b> |
| CH                                     |      |             |              |              |                 |                                   |                 |       |              |              |              |              |              |                          |              |              |              |              |              |              |              |        |        |              |                      | 1.00         | <b>0.75</b>  | <b>0.60</b>  | <b>0.91</b>  | <b>0.62</b> |
| PC                                     |      |             |              |              |                 |                                   |                 |       |              |              |              |              |              |                          |              |              |              |              |              |              |              |        |        |              |                      |              | 1.00         | <b>0.84</b>  | <b>0.81</b>  | <b>0.70</b> |
| CA                                     |      |             |              |              |                 |                                   |                 |       |              |              |              |              |              |                          |              |              |              |              |              |              |              |        |        |              |                      |              |              | 1.00         | <b>0.71</b>  | <b>0.41</b> |
| AA                                     |      |             |              |              |                 |                                   |                 |       |              |              |              |              |              |                          |              |              |              |              |              |              |              |        |        |              |                      |              |              |              | 1.00         | <b>0.65</b> |
| AM                                     |      |             |              |              |                 |                                   |                 |       |              |              |              |              |              |                          |              |              |              |              |              |              |              |        |        |              |                      |              |              |              |              | 1.00        |

CCS = complex carbon source; CH = carbohydrates; PC = phosphate – carbon; CA = carboxylic acid; AA = aminoacids; AM = amines.

For the other acronyms, see explanations in the “Material and methods” section.
